# Supplementary material for: Symmetric full cells assembled by using self-supporting Na3V2(PO4)3 bipolar electrodes for superior sodium energy storage
Source: Royal Society of Chemistry journal article supplement (doi:10.1039/c6ta02218a), 2016-01-01
Supplement: c6ta02218a1.pdf [file c6ta02218a1.pdf]

## ***Electronic Supplementary Information for***

### **Symmetric Full Cell Assembled by Self-supporting $\text{Na}_3\text{V}_2(\text{PO}_4)_3$ Bipolar Electrodes for Superior Sodium Energy Storage**

*Yi Zhang, Hongyang Zhao and Yaping Du\**

#### **Experimental Section**

*Synthesis of  $\text{Na}_3\text{V}_2(\text{PO}_4)_3$ /carbon elastic foam:* A given amount of  $\text{NaH}_2\text{PO}_4$  (0.115 g, 99%, Alfa Aesar),  $\text{NH}_4\text{VO}_3$  (0.078 g, 99%, Alfa Aesar), oxalic acid (0.168 g, 99%, Alfa Aesar) and sucrose (0.1 g, 99%, Alfa Aesar) was dissolved in 40 mL deionized water to form a clear green solution. Then the solution was totally absorbed by a piece of melamine foam (5 cm × 3 cm × 3 cm). Afterwards, this melamine foam was transferred to oven for 12 h at 80 °C and the NVP foam precursor was obtained. The NVP foam precursor was first sintered at 350 °C for 4 h and then annealed at 700 °C for 4 h in  $\text{Ar}/\text{H}_2$  (95%:5%) with the heating rate of 5 °C  $\text{min}^{-1}$ . Finally, the NVP/ECF was achieved. In contrast, sucrose are replaced by blank (without sucrose), hexadecyl trimethyl ammonium bromide (CTAB) and polyvinyl pyrrolidone (PVP) respectively to prepare NVP/ECF under the same condition and the digital picture are shown in Figure S1.

*Electrochemical Measurements for SIB:* The electrochemical test of NVP/ECF self-supporting electrode in half cell were carried out using CR2032 coin-type cells,

consisting of a NVP/ECF self-supporting electrode and sodium metal anode separated by a glass fiber. The cell were assembled in a glove box filled with dried argon gas. For full cell assembly, the NVP/ECF self-supporting electrodes ( $0.7\text{ cm} \times 0.7\text{ cm}$ ) was used as cathode and NVP/ECF self-supporting electrodes ( $1 \times 1\text{ cm}$ ) was used as anode, these two electrodes were separated by a piece of glass fiber under vacuum. Polyethylene film was used as a transparent packaging substance. The electrolyte was a mixture of ethylene carbonate and dimethyl carbonate 1:1 (w/w) containing 1 M  $\text{NaClO}_4$  and 5 wt% flouroethylene carbonate additive.

CV and charge/discharge measurements were carried out on a CHI660D electrochemistry workstation and Land Battery Measurement System at room temperature. In half cell system, the electrochemical test was conducted at various current densities in different voltage ranges ( $2.5\text{ V} \sim 4.0\text{ V}$  for cathode test and  $1.2\text{ V} \sim 2.5\text{ V}$  for anode test). CV studies were carried out between 1.2 and 4 V at  $0.5\text{ mV s}^{-1}$ . In full cell system, the electrochemical test was conducted at various current densities in the voltage range of  $1.0\text{ V} \sim 2.5\text{ V}$ . CV studies were carried out between 1.0 and 2.5 V at  $0.2\text{ mV s}^{-1}$ ,  $0.5\text{ mV s}^{-1}$  and  $1\text{ mV s}^{-1}$ .

*Characterizations:* HRTEM micrographs were obtained with a Philips Tecnai F20 FEG-TEM (The USA) operated at 200 kV. Raman spectrum of powder samples were recorded on LabRAM HR Raman microscope with a laser excitation wavelength of 532 nm. The X-ray diffraction XRD patterns were obtained using a Rigaku D/MAX-RB with monochromatized Cu  $K\alpha$  radiation ( $\lambda=1.5418\text{ \AA}$ ) in the  $2\theta$  ranging from  $10^\circ$  to  $60^\circ$ . X-ray photoelectron spectra (XPS) were conducted using a PHI

Quantera SXM instrument equipped with an Al X-ray excitation source (1486.6 eV).

Binding energies (BEs) are referenced to the C1s of carbon contaminants at 284.6 eV.

All samples were prepared by depositing a thin layer of products onto a cleaned Si wafer and drying at room temperature.

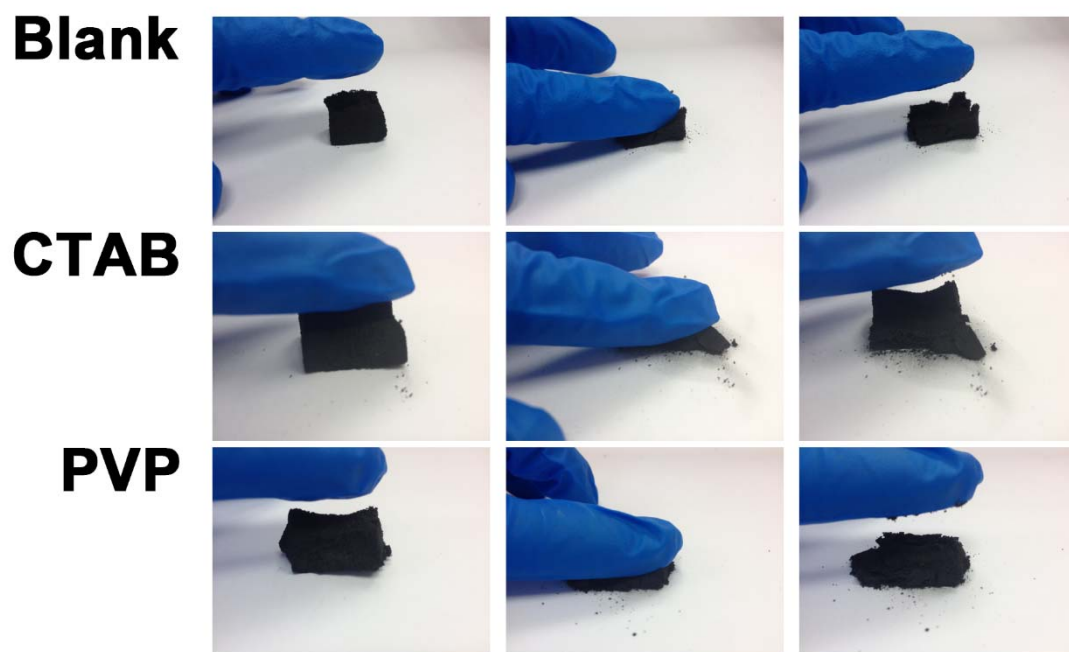

**Figure S1.** Digital picture of the NVP/CF samples prepared under other conditions.

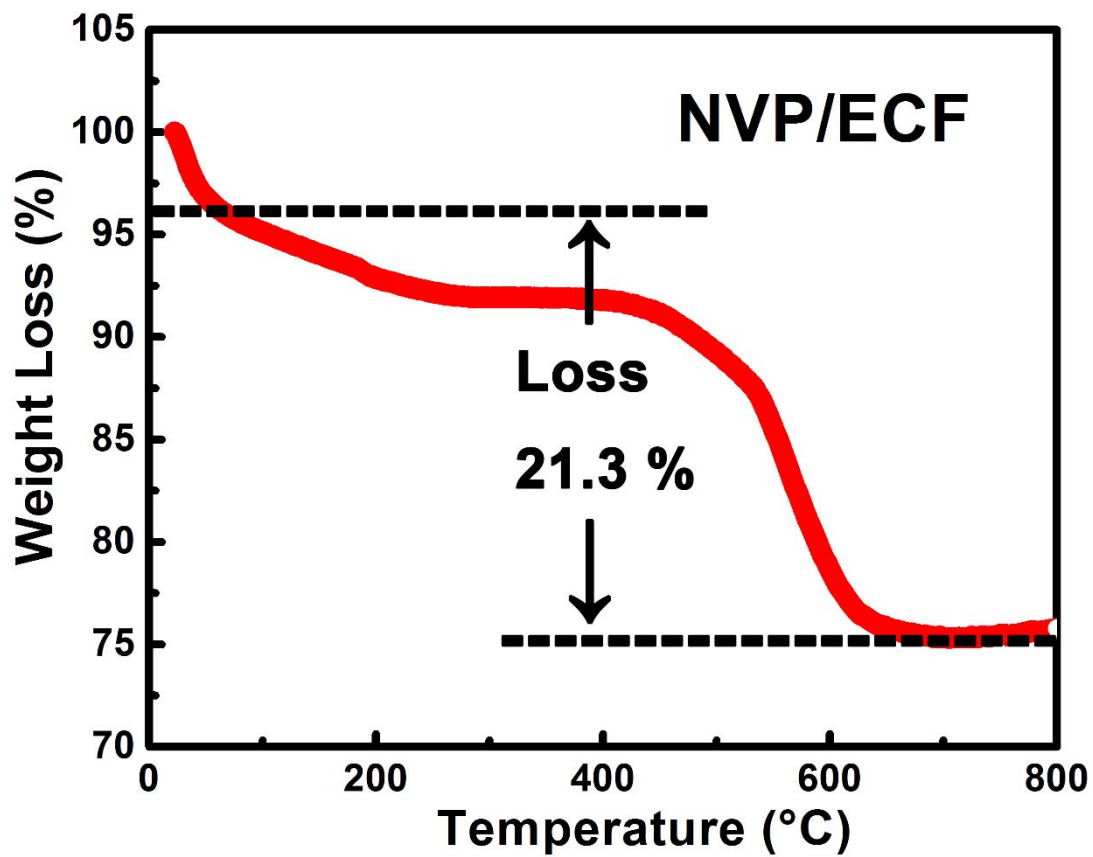

Figure S2. TG curve of the NVP/ECF sample in air atmosphere.

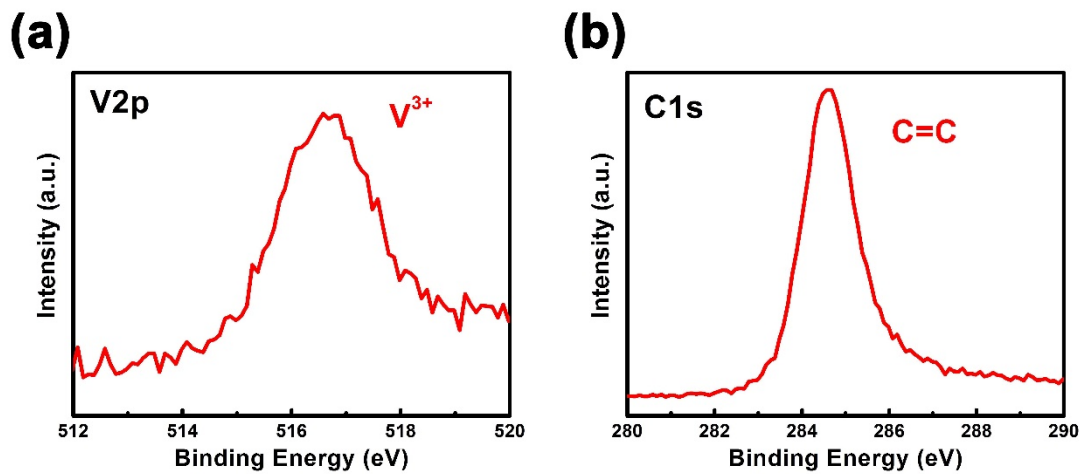

Figure S3. XPS spectra of V2p (a) and C1s (b) for the NVP/ECF sample.

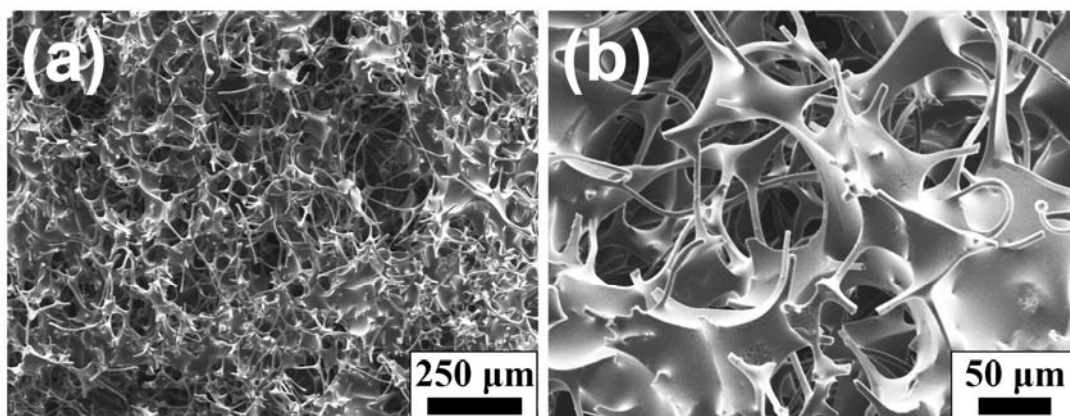

**Figure S4.** SEM images of NVP/melamine foam precursor.

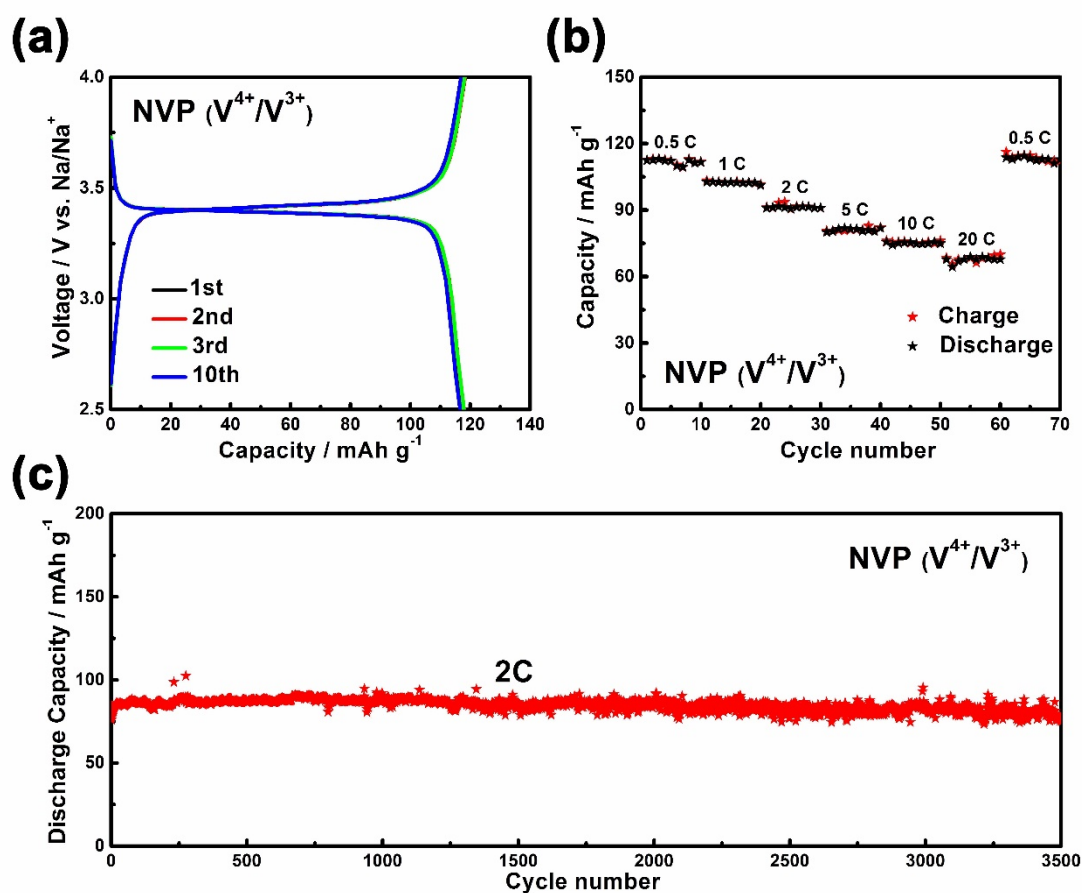

**Figure S5.** Electrochemical performance of NVP/ECF self-supporting electrode as cathode material for half cell test in a voltage range from 2.5 to 4.0 V. (a) Charge/discharge curves cycling at 0.5 C, (b) Rate performance, (c) Cyclic properties at 2 C throughout 3500 cycles.

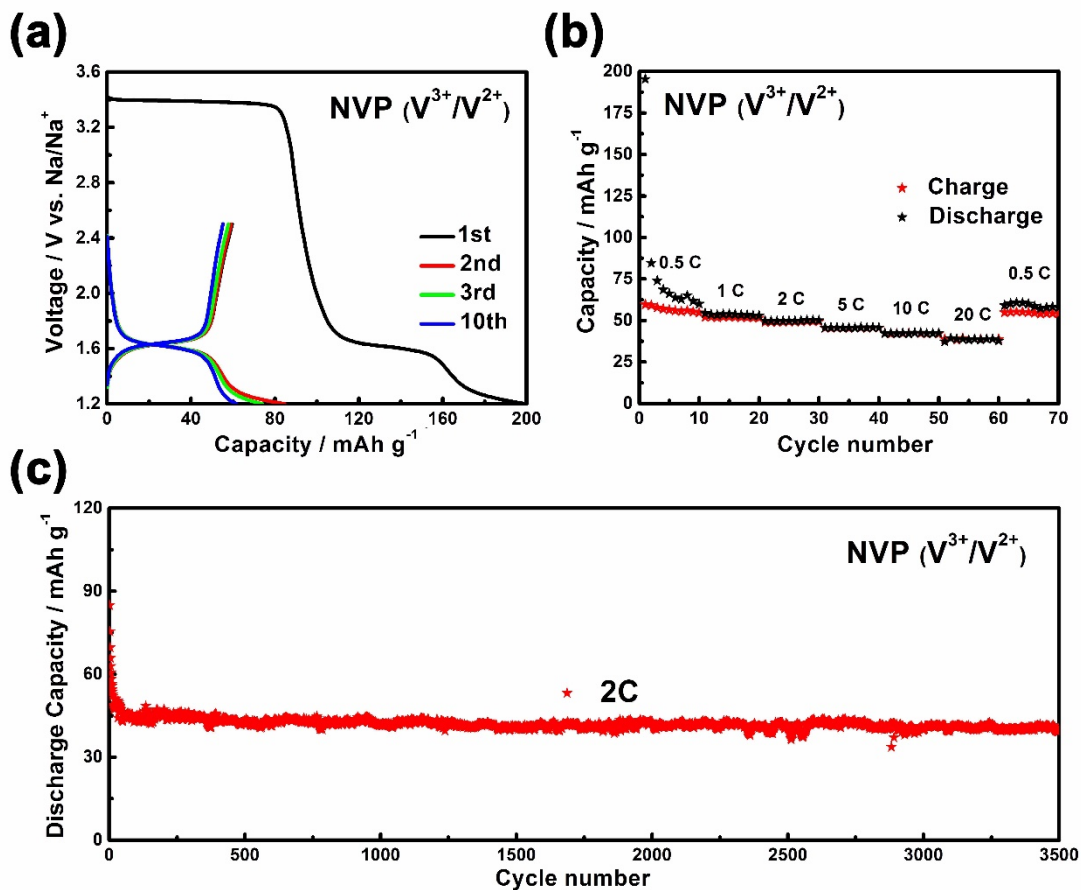

**Figure S6.** Electrochemical performance of NVP/ECF self-supporting electrode as anode material for half cell test in a voltage range from 1.0 to 2.5 V. (a) Charge/discharge curves cycling at 0.5 C, (b) Rate performance, (c) Cyclic properties at 2 C throughout 3500 cycles.

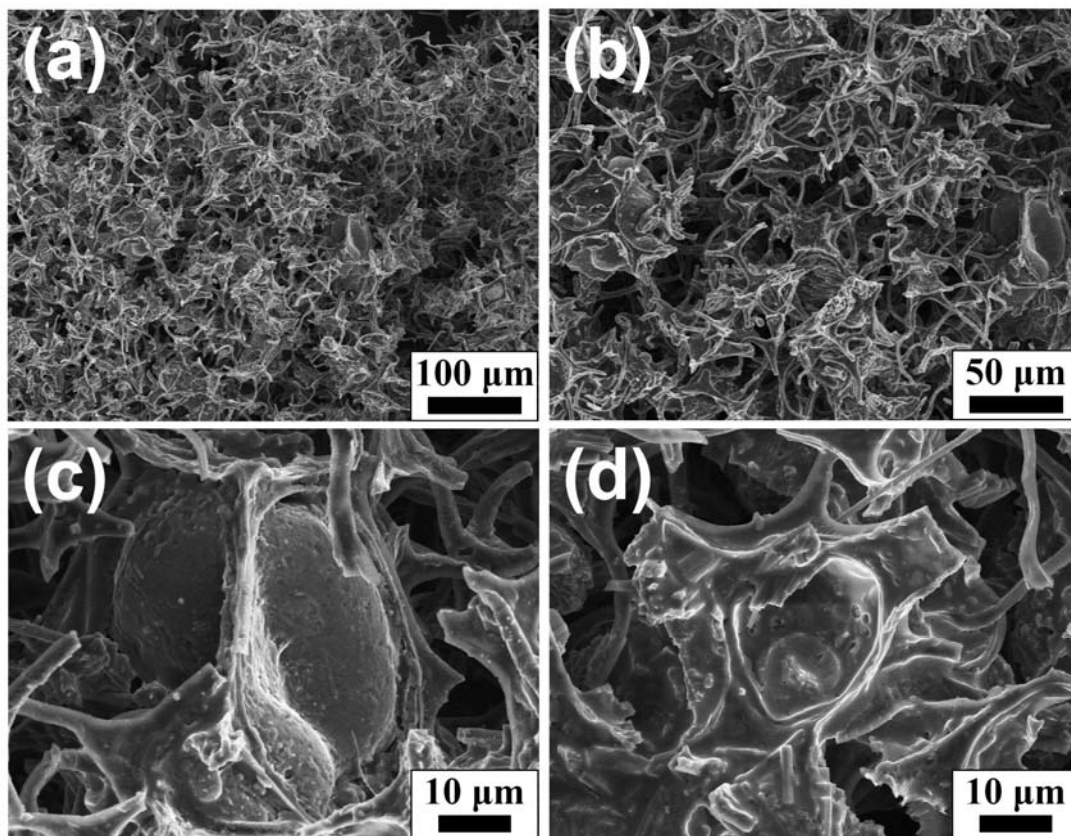

**Figure S7.** SEM images of NVP/ECF cathode after 280 cycles at 2 C.



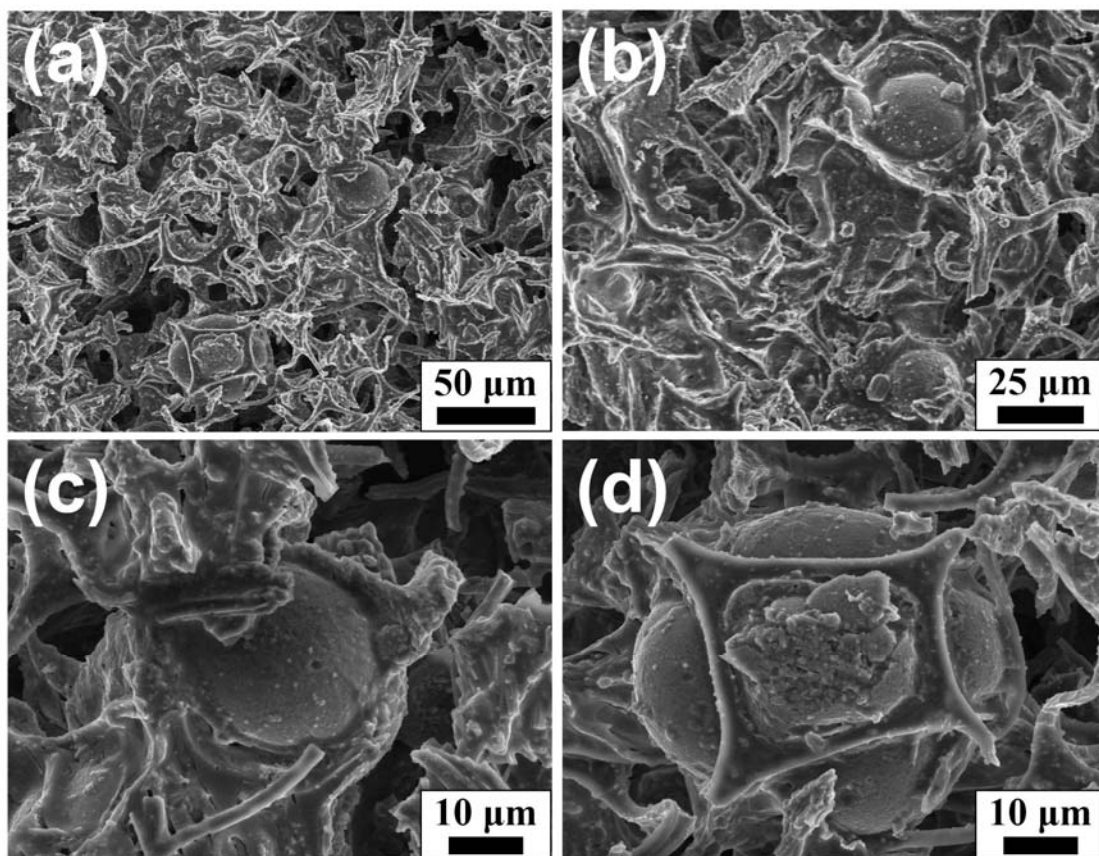

**Figure S8.** SEM images of NVP/ECF anode after 280 cycles at 2 C.

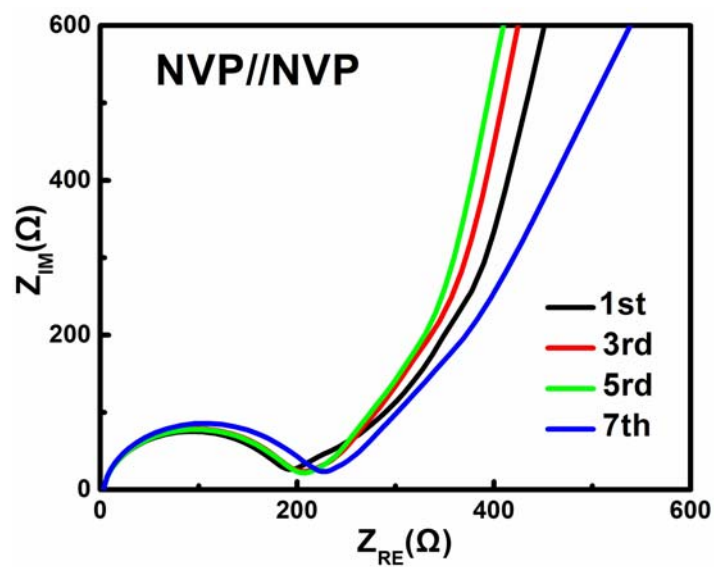

**Figure R1.** Electrochemical impedance spectroscopy (EIS) of the NVP//NVP full cell after 1st, 3rd, 5th and 7th charge/discharge process (current density = 0.5 C), respectively.



**Table S1.** Comparison of the present sodium symmetric full cell

| Bipolar material                                                                         | Self-supporting | Calculation based on                       | Rate performance of full cell |                             | Cycling performance of full cell |                                     | Ref                             |
|------------------------------------------------------------------------------------------|-----------------|--------------------------------------------|-------------------------------|-----------------------------|----------------------------------|-------------------------------------|---------------------------------|
|                                                                                          |                 |                                            | capacity (mAh/g)              | maximum current density (C) | current density (C)              | capacity retention (to 100th cycle) |                                 |
| <b>NVP/ECF self-supporting electrode</b>                                                 | Yes             | Total mass of the cathode                  | 33.8                          | 10                          | 2                                | 90.2%                               | Present work                    |
|                                                                                          |                 | The mass of active material of the cathode | 43                            |                             |                                  |                                     |                                 |
| <b>NVP/AC</b>                                                                            | No              | The mass of active material of the cathode | 42.2                          | 10                          | 1                                | 79.5%                               | Adv. Mater. 2014. 26, 3545-3553 |
| <b>Na<sub>0.8</sub>Ni<sub>0.4</sub>Ti<sub>0.6</sub>O<sub>2</sub></b>                     | No              | The mass of active material of the cathode | 53                            | 1                           | 1                                | 81%                                 | Energy. Environ. Sci. 2015. 8,  |
| <b>Na<sub>0.66</sub>Ni<sub>0.17</sub>Co<sub>0.17</sub>Ti<sub>0.66</sub>O<sub>2</sub></b> | No              | The mass of active material of the cathode | 92                            | 2                           | 5                                | 95%                                 | Angewandte Chemie 2015. 54,     |
| <b>Na<sub>0.6</sub>Cr<sub>0.6</sub>Ti<sub>0.4</sub>O<sub>2</sub></b>                     | No              | The mass of active material of the cathode | 58                            | 12                          | 1                                | 75%                                 | Nat Commun. 2015. 6             |
